# Supplementary material for: Response strategies to acute and chronic environmental stress in the arctic breeding Lapland longspur (Calcarius lapponicus)
Source: Commun Biol. 2024 Dec 19;7:1654. doi: 10.1038/s42003-024-07370-4 (PMC11659517; doi:10.1038/s42003-024-07370-4)
Supplement: Supplementary file 2 — Supplementary Table S2 [file 42003_2024_7370_MOESM2_ESM.xlsx]

## Sheet: TES_spring
Gene	log2FoldChange	padj
TBC1D8	1.99665	0.00419798
SNX33	1.70172	0.0173981
AMBP	1.58755	0.0202903
LOC101747660	1.56159	0.00419798
LOC120325194	1.51978	0.0409426
LOC106857638	-0.741731	0.0437023
LOC116452688	-1.12443	0.0410068
LOC113459363	-1.5211	0.00419798
FMN2	-1.59868	0.00419798
ZP3	-1.85423	0.0409426

## Sheet: TES_LHS
Gene	log2FoldChange	padj
LOC121471035	2.25671	1.43924e-05
Scaffold_Scaffold_14.746756	2.14143	0.000254824
Scaffold_Scaffold_2.183922	1.91362	0.00138935
Scaffold_Scaffold_15.760559	1.86148	0.00075681
Scaffold_Scaffold_23.875863	1.82069	0.00636412
RASAL1	1.7086	0.000729025
LOC111929592	1.70033	0.00425513
IFI27L2	1.68464	0.00231408
ASCC2	1.68433	0.00183961
LOC114064641	1.66715	0.00565807
LOC111926675	1.65647	0.00112066
LOC117245291	1.65341	0.00584944
Scaffold_Scaffold_23.877112	1.64409	0.00519338
Scaffold_Scaffold_19.817445	1.63896	0.00153892
ST6GALNAC4	1.63744	0.000564852
LOC101821714.1	1.62626	0.0132862
BTBD17	1.62023	0.00100951
LOC115903953	1.60996	0.00112066
Scaffold_Scaffold_18.804398	1.59794	0.0035176
TYSND1	1.56728	7.75316e-05
Scaffold_Scaffold_7.535304	1.53775	0.00577171
LOC120755210	1.52143	3.18481e-05
LOC106036462	1.51385	0.0127493
LPIN1.2	1.50742	0.00757604
PIH1D1	1.50476	0.00796196
PSTPIP2.1	1.50409	0.0172082
LOC102072568	1.50127	0.00183961
Scaffold_Scaffold_6.452012	1.49185	0.00871157
BLOC1S1	1.49103	0.00143548
LOC117245293	1.4899	0.00996786
GAP43	1.48833	0.0127493
LOC101821714	1.48787	0.0230772
LOC121357464.1	1.4705	0.00508483
Scaffold_Scaffold_2.175506	1.46532	0.0172082
LOC120502275	1.46336	0.00721969
Scaffold_Scaffold_1.88448	1.45764	0.0268091
TARBP2.1	1.45548	0.00508483
LOC117245293.1	1.45522	0.0148631
TNNC2	1.42933	0.00385497
ANO3.2	1.42682	0.0173692
CHST3	1.42117	0.0276229
Scaffold_Scaffold_1.98392	1.41693	0.0179025
BAG5	1.41672	0.0243716
HAND2	1.4111	0.0184241
AOC1	1.40731	0.000564852
Scaffold_Scaffold_11.667966	1.3986	0.0173692
MOGS	1.3869	0.00153892
LOC101821714.3	1.385	0.0367639
LOC118701303.9	1.38105	0.0102776
Scaffold_Scaffold_14.747154	1.37723	0.00584944
LOC116453709	1.37609	0.0172082
LOC111938402	1.37374	0.0173692
GRID2	1.37175	0.0190665
REEP6.3	1.37012	0.00153892
SERPINB6	1.36635	0.0274305
LOC116449063.5	1.36362	0.0276229
SLC39A3.2	1.36324	0.00210435
LOC113458984	1.36176	0.0241635
LOC116793110	1.35693	0.0276229
OPCML	1.35308	0.0105148
C4H2orf81	1.35289	0.00974941
FEM1C	1.35043	0.0213167
ANXA13	1.34408	0.0177173
Scaffold_1963.1259520	1.3348	0.01735
WNT3A	1.33117	0.0311758
RAB32	1.33025	0.00239133
Scaffold_Scaffold_23.880435	1.32981	0.0267732
LOC121333898	1.32819	0.0304216
LOC115494119	1.32679	0.0308102
LOC111925169	1.32395	0.0422982
ARID5A	1.32183	0.0318918
Scaffold_Scaffold_23.870690	1.30534	0.0227859
LRRC8D.1	1.30236	0.0257661
LOC110388209	1.30138	0.0239386
LOC119707957.1	1.3006	0.0276381
LOC119257690.20	1.29501	0.000417303
ZNF414	1.29101	0.00456145
Scaffold_Scaffold_3.235729	1.28322	0.0304216
TAMALIN	1.28115	0.0132862
MAPK15.3	1.27387	0.024386
LOC106629811	1.27016	0.0268091
LOC121468890.2	1.26642	0.031207
LOC112989383	1.26346	0.0255476
LOC121355597	1.26147	0.00163314
Scaffold_Scaffold_10.651676	1.2602	0.0260886
LOC110364577	1.25864	0.0374755
LOC101751416.5	1.25841	0.034117
Scaffold_Scaffold_2.163360	1.25695	0.0331964
Scaffold_Scaffold_7.511514	1.25141	0.000853478
LOC111927593	1.25037	0.0172082
Scaffold_Scaffold_8.583081	1.24843	0.0368636
Scaffold_Scaffold_5.425443	1.24801	0.0336548
MFSD12	1.2478	0.0380573
LOC107209629	1.24449	0.0366769
NKX2-3.1	1.24213	0.0367639
PIH1D1.1	1.23267	0.0387965
Scaffold_Scaffold_4.332139	1.23206	0.042874
TLX2	1.23099	0.0345135
LOC113998574.1	1.22973	0.0318918
DHDH	1.22802	0.0267544
LOC118700956.5	1.22592	0.0172082
LOC102074814.1	1.22536	0.0374755
WRAP53	1.2244	0.0243716
LOC118694960	1.22342	0.0302754
GPKOW.1	1.22229	0.0302754
PORCN	1.2136	0.0387533
WDR45	1.21179	0.0308102
LOC118686186	1.21095	0.0491441
LOC121470024	1.20869	0.0236681
GTF2H5	1.20659	0.0291372
LOC110364679	1.20336	0.0494905
TOP1MT.1	1.1984	0.0354124
ETHE1	1.19837	0.0380361
LYSMD1	1.19635	0.00816183
GPR179.2	1.19099	0.0304216
DNAJC27	1.19014	0.0400964
P2RX6	1.18925	0.00086883
LOC120506876	1.1758	0.0259715
RABGGTA	1.17385	0.00996786
LOC121336439	1.17298	0.0323248
LOC113950598	1.17198	0.0494995
LOC109143981	1.17096	0.0242635
TUT1	1.16563	0.0474212
MRPS27.1	1.16407	0.0231018
LOC116436405.1	1.1636	0.03981
Scaffold_Scaffold_23.874965	1.16129	0.0459066
TARBP2	1.16124	0.00584944
CYP4A22	1.16119	0.0491441
ALDH4A1.1	1.16118	0.0259533
PSMB6	1.16109	0.0172082
LOC119703210.2	1.16092	0.0150172
BTG2	1.15751	0.0277319
ACBD4.1	1.15415	0.0494995
TNMD.1	1.15322	0.0494905
LOC115908814	1.15208	0.0301135
Scaffold_Scaffold_11.681044	1.14602	0.0455983
TIMM10B	1.14446	0.0384068
LOC115916055	1.1431	0.0254646
LOC108448534	1.14291	0.0474311
LZTS2	1.13741	0.0255476
LOC115491111	1.1309	0.044298
SFXN5.1	1.12807	0.0304216
Scaffold_Scaffold_13.725059	1.12803	0.0275155
DHPS	1.12745	0.019888
LOC119700942	1.12337	0.0220412
LOC101807559	1.12077	0.0380361
Scaffold_Scaffold_6.479930	1.12002	0.0302754
TMED3	1.11902	0.048695
LOC115491081	1.1173	0.0447531
LOC119708423	1.11567	0.0172082
LOC121088116	1.11147	0.0459066
LOC111925989	1.1111	0.0434415
MRPS24	1.10655	0.031601
DHX16.1	1.10466	0.0275155
HDAC7	1.10118	0.00827683
LOC102068158.5	1.10049	0.00510797
LRRC10B	1.09962	0.00909647
AOC1.1	1.09594	0.0217202
DHX16	1.09264	0.0154173
LOC120498610	1.09143	0.0255476
LOC121469247	1.09045	0.0106638
LOC101747660	1.08823	0.0304216
DOHH	1.0871	0.0342297
LOC118700956.9	1.08494	0.0375502
TBCB	1.07987	0.0195932
NKIRAS1	1.07641	0.047818
TPP1	1.07621	0.0459066
LOC113995684	1.07428	0.0289994
LOC111933496	1.07363	0.0172082
ELOF1	1.07343	0.0318153
EXOSC5	1.07247	0.0304216
RABEPK	1.07238	0.0267732
IL17RC	1.07158	0.0417664
DNAJC14	1.07109	0.00783438
Scaffold_Scaffold_4.348050	1.07087	0.0380361
TDRKH	1.0701	0.0442951
C1R	1.07009	0.0450124
PGAP3	1.0655	0.0172082
HROB.2	1.06505	0.0196908
LOC121333353	1.05592	0.0374755
FBXO46.1	1.05551	0.0380361
ATP6V0A4	1.05499	0.0255476
MRPL10	1.05294	0.0407832
ASB10	1.05226	0.0380361
SNTB2	1.04545	0.0304216
LOC115948904.5	1.04541	0.0468608
PTCHD4	1.0421	0.0268091
MORN4	1.04056	0.0130982
TMOD4.1	1.0395	0.0177675
MRPL45	1.03908	0.0168073
LOC116445564	1.03535	0.0242635
Scaffold_Scaffold_7.525746	1.03481	0.0380361
ITM2B	1.03456	0.0188245
DPH2	1.03348	0.0177675
PC.2	1.03164	0.0190977
LOC119699105	1.02914	0.0173692
WDR54	1.02749	0.030775
DDX56.1	1.02637	0.0172082
LOC121361490	1.02605	0.0324808
HSF1	1.02428	0.0456612
RBM14	1.02153	0.0405798
LOC415939	1.01802	0.0221765
PFN1	1.01038	0.0213167
CD40	1.00909	0.00584944
TMUB1	1.0087	0.042751
ACBD4	1.0076	0.0323248
FAM171A2	1.0074	0.0481384
LOC119260132.14	1.00728	0.0261211
NDUFV1	1.00543	0.0186421
LOC108963942	1.00306	0.0418138
PIK3CD	1.0022	0.0304216
NEK3	0.999214	0.022053
DTX3	0.996438	0.0247171
PC	0.995514	0.0144045
DECR2	0.994911	0.0126214
PRODH	0.989768	0.000417303
IL6R	0.986641	0.0181159
GAMT	0.982493	0.00565807
LOC119257690.7	0.982307	0.0299887
CCDC115	0.979319	0.0172082
Scaffold_Scaffold_2.185261	0.979138	0.0370935
TMED4	0.978753	0.0172082
USP21	0.976377	0.0261954
LOC113460432	0.974096	0.0407832
SYT12	0.97247	0.0131426
AUP1	0.971959	0.0144045
LOC121666247	0.968254	0.0374755
LOC112533358	0.967368	0.0247171
LOC115493985	0.966773	0.0126214
NOB1	0.965727	0.0267732
ACY1	0.965325	0.034117
LOC119703121	0.964748	0.0409778
MID1IP1.1	0.962539	0.0258258
LOC118700098	0.961013	0.0494995
LOC118696013	0.959446	0.0366769
LOC106629440	0.958785	0.034117
ROMO1	0.95798	0.0292645
SSR2	0.956921	0.00584944
LOC121670968	0.95521	0.0291855
PPOX.1	0.954356	0.0177173
DPH1	0.947975	0.0239386
NEMF.1	0.94551	0.0277319
CTU2	0.944399	0.0443389
B3GAT3	0.94219	0.030775
TBX4	0.935456	0.0130982
LOC119711619.1	0.935146	0.0291372
LMF2	0.932394	0.0172082
ZC3HC1	0.929362	0.0142285
HNRNPA1	0.928267	0.0419758
WRAP53.1	0.927866	0.0494905
WDR81	0.922511	0.0470472
KCNAB2	0.921981	0.0301135
RND1.1	0.916743	0.0494905
TMCO7	0.915867	0.0189809
DAPK3	0.915437	0.0172082
PREB	0.913792	0.0438836
LOC427778.1	0.913464	0.0247171
POLR3C	0.912798	0.0215214
AGBL5	0.912591	0.0384068
DAP3	0.91185	0.0455983
GPT.1	0.909647	0.0105148
RAD23A	0.909123	0.0185991
Scaffold_Scaffold_6.500728	0.908565	0.034117
RPS10	0.908457	0.0365549
METTL15	0.90652	0.0350986
GNMT	0.905739	0.0374755
MRPL17	0.903356	0.0428248
LOC102038191	0.900224	0.0494905
MCRIP1	0.898764	0.0486301
APOA1BP	0.897103	0.0348499
RELL2	0.896027	0.0358103
CNOT6.1	0.894923	0.0326908
YKT6	0.886109	0.0172082
NDUFA11	0.885994	0.0148631
POLR3D	0.885322	0.0423391
NIP7	0.884328	0.0374755
ELP3	0.881184	0.0279671
ASH2L	0.8796	0.0173064
STIP1	0.879216	0.0396951
NEDD8	0.87863	0.0126214
PIP4K2C	0.870994	0.0484054
ARMC6	0.870246	0.0308102
TAF11	0.866365	0.0238154
TMEM115	0.864284	0.0213167
ZDHHC9	0.863323	0.027603
SMARCD3	0.861157	0.0215811
LOC101748755.1	0.861027	0.0304216
WBSCR22	0.860844	0.0380361
NPRL2.1	0.855023	0.0417664
CBFA2T2	0.854577	0.0291809
OTUB1	0.852963	0.0238154
SARS2	0.852352	0.0442951
SHARPIN.1	0.846528	0.0221765
KANSL2	0.846215	0.00971728
PGP.2	0.844994	0.0167615
LOC119257690.15	0.842526	0.0385147
LMAN2	0.84122	0.0331964
LOC107050662	0.840558	0.0380361
TEX2L	0.837804	0.0301135
LOC107052763	0.832933	0.0345135
ARRDC3.1	0.831244	0.0177173
HTATIP2	0.831161	0.0172082
NUDCD3	0.830407	0.031601
PHPT1	0.830157	0.0494905
ITPA	0.827486	0.0132862
ENG	0.821261	0.0259533
CAMK1	0.821035	0.0317467
LOC111923721.1	0.817086	0.00796196
LAMTOR5	0.813738	0.0423391
LOC115917126	0.813605	0.0274305
LOC112531384	0.813133	0.0273755
CABLES2	0.811911	0.0342297
IPPK	0.811139	0.0336548
PSMD4	0.807189	0.0396951
PSMA5	0.80472	0.0221765
TRMT12	0.803328	0.0426248
KLHDC8B	0.803018	0.0417664
ARMC6.1	0.801343	0.0494905
APH1A.1	0.800904	0.0234234
POLR2H	0.79997	0.0494905
RPS27	0.798126	0.0492036
PEX12	0.798066	0.0374755
YRDC	0.797449	0.0479455
TLCD1	0.7961	0.0493701
ATP6V1F	0.795888	0.0491441
MED8	0.794412	0.0148631
CYB561A3	0.78987	0.0422305
PGF	0.788906	0.0427669
IKZF5.3	0.781323	0.0132862
TUB4A	0.775287	0.034117
LIG3	0.77228	0.0302754
PRPF3	0.769327	0.0480852
ATPAF2	0.76905	0.0409522
ATP9A.15	0.766622	0.0423391
MST1	0.761402	0.0260653
SIRT6	0.761044	0.0415638
MSL1	0.759533	0.00210435
SRPRB	0.758638	0.00086883
WDR18	0.753335	0.0424403
F8A3	0.747195	0.04983
EIF3I	0.742608	0.0417664
PANX3	0.74212	0.0291855
LOC119708547	0.735669	0.0355992
MTO1	0.732579	0.0308102
GUSB	0.732162	0.0267544
PPP1CA	0.731346	0.0422305
DNMT3A	0.731122	0.0215811
NUDT16L1	0.727535	0.0241635
IGBP1	0.72086	0.0304216
LOC118690544	0.713085	0.00996786
LOC121340722	0.711524	0.0277319
NF2	0.710577	0.0366769
LURAP1	0.709789	0.0494905
MUL1	0.709612	0.034117
SCAMP2.1	0.705337	0.0280769
INTS11	0.700482	0.00996786
GRAMD2	0.697151	0.0304216
COPZ1	0.697066	0.0382743
LOC100858919	0.695249	0.0173692
KLHL12	0.694027	0.015814
MTMR14	0.692792	0.0459066
PANK2	0.692449	0.00318604
DUSP4	0.690506	0.0442951
SCYL3	0.686695	0.0390646
KRT80.2	0.683165	0.0417664
GMEB2	0.681864	0.0494905
MNAT1	0.678428	0.0144045
EMC8	0.675773	0.0481384
PSMG1	0.667543	0.0205585
WIZ.2	0.665944	0.0473802
ANKZF1	0.648867	0.0238154
COX19	0.639632	0.00584944
PRCC	0.637602	0.0374755
ZNF821	0.631802	0.0494905
RFC5	0.627707	0.0267544
DM5L	0.625937	0.0397705
LOC420294	0.612572	0.0494995
CPSF4	0.60524	0.0494905
PPP6R2	0.595886	0.034117
PEMT	0.594254	0.00207246
RPS13	0.592733	0.0442951
LHFPL4	0.591102	0.0494905
AMDHD2	0.586859	0.0363344
DMC1.2	-0.586256	0.0390646
DGKE.1	-0.590227	0.0177173
ANO10	-0.598263	0.0478756
WDR19	-0.607014	0.0172082
HELB	-0.607205	0.0471277
LZTS3.1	-0.613891	0.0190977
CLCN3	-0.619476	0.0105148
KIAA0930	-0.628448	0.0374755
MCMDC2.1	-0.638187	0.0190977
HFM1	-0.638682	0.0423391
HENMT1	-0.642717	0.0167106
KCTD21	-0.649793	0.0474212
LOC118690390.3	-0.652034	0.0268615
FAR2	-0.660538	0.0188245
DOPEY2.1	-0.664095	0.0442951
FHIT	-0.672395	0.0354124
PNLIPRP3	-0.680064	0.0308102
AP4E1	-0.683346	0.0239386
LOC118685526	-0.687852	0.0370709
DHCR24	-0.699644	0.0188245
AVL9	-0.702932	0.00583608
LOC118690390.4	-0.706279	0.0190665
LDLRAD3	-0.720008	0.0304216
CHGB	-0.722302	0.0143177
SCUBE2	-0.728717	0.034117
FAM81A	-0.730505	0.0132862
DOPEY2.2	-0.746651	0.0255476
SPEN	-0.754222	0.0447531
GPLD1.1	-0.754575	0.0442951
LOC106857638.1	-0.764524	0.00425513
HMGCR	-0.765438	0.0185991
GPRC5B.1	-0.76862	0.0483867
SS18L1	-0.772286	0.0374755
SLC36A4	-0.793379	0.0380573
PHYKPL	-0.808354	0.0313481
SLC40A1	-0.813591	0.00425513
LOC117244881	-0.816267	0.0366769
SP3	-0.821382	0.00846835
LOC115948605.4	-0.824088	0.0494995
N4BP2L2	-0.82715	0.00159546
SALL1.1	-0.835482	0.034117
LLPH	-0.835709	0.0365549
WWC2	-0.845736	0.0035176
CPT1A	-0.85087	0.0380297
CCNT2	-0.85661	0.00609677
SLCO1B1	-0.8583	0.0443389
FAM184B	-0.864755	0.0479455
LOC115493918	-0.868611	0.0468608
LOC106631380	-0.869231	0.00163092
LANCL3.1	-0.872005	0.0257725
RLF	-0.875685	0.0260222
RELN	-0.887501	0.039574
RARB	-0.890311	0.0350986
SLC16A14	-0.900832	0.0309848
TPCN2	-0.900966	0.0318918
LIPML5	-0.908899	0.0494905
LOC108445597	-0.913366	0.0345135
LOC118701303.2	-0.92598	0.0239649
STRIP2.3	-0.926455	0.0160013
LTK	-0.93452	0.0390646
LOC118699607	-0.936094	0.0377162
DCAF17.2	-0.954235	0.0327316
IL17RD	-0.957796	0.019888
GPRC5B	-0.9585	0.0239386
LOC119696521.3	-0.958988	0.0367639
LRP1B	-0.95916	0.034117
COL6A2	-0.961451	0.0358103
LOC121468688.4	-0.969711	0.0494905
TTC37	-0.969814	0.0172082
PARPBP	-0.975983	0.0380361
CCDC122.1	-0.976298	0.00360064
ATP9A.2	-0.978638	0.0105148
SMC5.10	-0.981511	0.0345135
SPON1	-0.990733	0.034117
AP4E1.1	-0.995193	0.00100951
MPZL1.5	-1.00293	0.00996786
LOC116996222.1	-1.00485	0.0160013
PDK4.2	-1.00822	0.0342085
LOC107215827	-1.01269	0.0314482
NBEA.1	-1.01758	0.0131426
LOC111924476	-1.0224	0.0267488
HHIPL1	-1.02697	0.0267544
LOC121671997	-1.0292	0.0459066
ALDH1A3.1	-1.03131	0.038076
LOC106629619.21	-1.04662	0.0143177
LOC120500651	-1.05241	0.0187093
LOC119701794	-1.06128	0.0449023
RHOU	-1.06257	0.0259533
ADAMTS2	-1.07262	0.0374755
Scaffold_Scaffold_4.381894	-1.07717	0.0380361
EXTL3.2	-1.08187	0.0454973
ANOS1	-1.09215	0.000451794
SCUBE1	-1.10161	0.00577171
MYBPC3	-1.10539	0.0160013
LOC116993413	-1.10604	0.0321383
LOC110392320	-1.10722	0.0239649
LOC107212845.1	-1.11036	0.0301524
COL1A2	-1.11327	0.0396951
Scaffold_Scaffold_4.376905	-1.1142	0.0493862
DDC	-1.11568	0.0267544
LOC111925041	-1.11879	0.0497535
Scaffold_Scaffold_3.247263	-1.12155	0.0200495
TAGAP	-1.12438	0.0267732
FDX1L	-1.12862	0.0261954
Scaffold_Scaffold_22.859349	-1.13032	0.0442951
CYTH3	-1.13978	0.0132862
Scaffold_Scaffold_19.819671	-1.14575	0.0355992
LOC113952489	-1.1462	0.0374755
COL19A1	-1.15599	0.0172082
LOC102069617	-1.15687	0.0304216
NRAP	-1.15894	0.0292645
LOC107204259	-1.16067	0.00201596
LOC102034257.19	-1.16567	0.0339794
LOC115485474	-1.17342	0.0144045
LOC116449025	-1.17655	0.0284797
LOC120749537	-1.18097	0.00508483
MKKS.1	-1.18259	0.043734
TJP1.2	-1.18497	0.0247171
RPGRIP1L.10	-1.18776	0.0267732
OTOG.1	-1.1969	0.0267732
LOC118699990.2	-1.19937	0.028653
LOC115484142	-1.20226	0.0459066
LOC102074794	-1.21122	0.0213167
STUM	-1.21335	0.0491441
LOC108449528	-1.21501	0.0132862
GRM4	-1.22082	0.0144045
LOXL1	-1.25341	0.024386
GSDMA	-1.26206	0.020862
LOC106629619.19	-1.26474	0.00996786
Scaffold_3001.1286569	-1.26886	0.0247171
ZFAT.1	-1.26957	0.00636412
IMPACT	-1.28557	0.0446647
CSMD3	-1.28581	0.0172082
MYT1L.2	-1.29282	0.0213167
COL1A1.1	-1.29431	0.031207
SYT10.1	-1.29541	0.0172082
LOC112533023	-1.30241	0.0167624
TNFAIP6	-1.31973	0.0301135
IQCJ	-1.32546	0.0225065
EMILIN3	-1.34749	0.00549034
Scaffold_Scaffold_3.238672	-1.3486	0.0144045
LOC101752139.2	-1.36137	0.0260222
CPB1	-1.37029	0.0175143
THBS2	-1.38322	0.0213167
CLSTN2	-1.39512	0.000314882
LOC116442350	-1.41204	0.0132862
POU1F1	-1.4348	0.0132862
LOC113459028	-1.43583	0.0267732
LOC116438930.1	-1.48019	0.00738947
LOXL4	-1.50803	0.00609677
LOC111939009	-1.50935	0.0068318
CFAP99.4	-1.52819	0.0109841
MSANTD1	-1.55248	0.000411104
LOC103812968	-1.60718	0.0172082
LOC117244930	-1.67355	0.00086883
LOC121109843	-1.73787	0.00695601
LOC102068158.6	-1.76623	0.00175977
Scaffold_Scaffold_14.741992	-1.83427	0.00153892
SLC26A7	-2.02298	4.78336e-06
ZP3	-2.89822	1.86534e-09

## Sheet: TES_storm
Gene	log2FoldChange	padj
KIAA0825.14	2.10363	0.000518108
ZC4H2.1	1.851	0.0239892
LOC108639695	1.75233	0.00642171
KIAA0825.13	1.70274	0.00656016
LOC115496926	1.70257	0.000960273
KIN.1	1.60306	0.0117153
LOC102068158.1	1.59097	0.0117153
LOC111934184	1.5755	0.00642171
Scaffold_Scaffold_3.238672	1.55384	0.00692693
LOC106856067	1.494	0.0214839
EOGT.1	1.48277	0.0117153
Scaffold_Scaffold_9.624568	1.45069	0.0254129
LOC107202704.1	1.42862	0.0254129
LOC116442350	1.42281	0.0255683
MAST4.1	1.41035	0.0275569
FBN1.3	1.40855	0.0324715
LOC120749537	1.40219	0.000574297
NSMCE4A.28	1.3017	0.00148962
LOC121468688.4	1.21663	0.0254129
DPF3.2	1.20527	0.00184529
RAD9B	1.20435	5.27716e-05
OXR1	1.17574	0.0275569
LOC115334581	1.16851	0.031074
DDC	1.15784	0.0479168
LOC106629619.21	1.09159	0.0208933
LOC121094669	0.985953	0.0412558
COL9A1	0.965732	0.0428552
LOC118701409.3	0.93462	0.00656016
LOC115949518	0.893422	0.0102707
LOC109143358	0.863012	0.0314582
CCDC122.1	0.857054	0.0289779
CCNT2	0.816877	0.0211667
SNTB1	0.814954	0.00872843
LOC119711414	0.766886	0.0479236
MCMDC2.1	0.716665	0.013726
ATP8B2	-0.63514	0.0264692
Scaffold_Scaffold_12.682722	-0.659407	0.0491213
PLIN1	-0.66194	0.0479168
SLC25A28	-0.685638	0.0264692
LOC111923721.1	-0.740403	0.0391382
PEMT	-0.759627	2.6423e-05
GINS1	-0.850591	0.0117153
CBR3	-0.858161	0.0117153
ATVR1	-0.86084	0.0292194
SORD.1	-0.902634	0.0157319
BTG1	-0.929786	0.0211667
ELP3	-0.932286	0.0429667
P2RX6	-0.960609	0.0255683
HMGCL	-1.0013	0.0292194
LOC119695015	-1.00747	0.0117153
HIST1H110	-1.02126	0.00709749
LOC120756069	-1.02315	0.0117153
LOC119260132.31	-1.0737	0.0410174
LOC119257690.10	-1.07376	0.0255683
LOC116807554.2	-1.15033	0.0479168
LOC111928877	-1.1509	0.0292194
LOC111935653	-1.15304	0.0292194
LOC119257690.13	-1.16397	0.0471026
LOC119260132.24	-1.16488	0.00405013
LOC102044498	-1.17293	0.00239396
LOC119257690	-1.179	0.031074
LOC118686411.2	-1.19416	0.0361426
LOC119260132.5	-1.20337	0.0360651
LOC119260132.13	-1.22139	0.0291678
NBL1	-1.22411	0.0211667
LOC108449020	-1.24978	0.0370139
ARMC9.1	-1.28078	0.036186
LOC120511457	-1.284	0.0360179
LOC120507544.2	-1.30373	0.0262131
SLC7A14	-1.32161	0.0412558
FOXJ1.1	-1.35574	0.0381538
MCC.2	-1.37132	0.0370154
C21orf91.1	-1.37139	0.0117153
Scaffold_Scaffold_8.585949	-1.38458	0.0288379
LOC111926675	-1.40214	0.0211667
LOC119260132.14	-1.40486	0.000960273
DYNC1I1.1	-1.40709	0.00304028
LOC120500697	-1.40865	0.0292194
GLP2R	-1.40942	0.0291001
RND1.1	-1.42258	0.0010751
NSMCE4A.14	-1.43481	0.0402853
HMGCS2	-1.44438	0.0264692
LAYN	-1.45615	0.000382022
RSF1.1	-1.4801	0.0211667
SOX9.1	-1.49284	0.0297682
Scaffold_Scaffold_15.759639	-1.51977	0.0117153
OLFML3	-1.52238	0.0051847
LOC118686411.5	-1.52549	0.00832035
Scaffold_Scaffold_1.88448	-1.52765	0.0211667
LECT1.1	-1.54966	0.0157319
NR1D1	-1.55426	0.00174713
ALB	-1.56288	0.0429667
SOX9.2	-1.68292	0.00683171
Scaffold_Scaffold_19.817445	-1.78566	0.000574297
Scaffold_Scaffold_15.760559	-1.81629	0.00162969
Scaffold_Scaffold_14.746756	-1.85873	0.0211667
LOC121471035	-1.90093	0.000960273
Scaffold_230.1048799	-2.03189	1.21999e-07
ST6GALNAC4	-2.16548	1.21999e-07

## Sheet: HEA_spring
Gene	log2FoldChange	padj
LOC113460187.7	2.72965	0.000592302
LOC113459404.1	2.62155	0.00243036
TNFRSF6B.24	2.56164	0.000734149
Scaffold_Scaffold_4.366508	2.25524	0.0191882
PIK3C2G	2.14254	0.0280954
F3.2	1.88855	0.000532802
Scaffold_Scaffold_2.170532	1.79118	0.0245069
KY	1.78145	0.0171332
RPRD1A.16	1.77617	0.0448625
COL13A1	1.44472	0.00195937
CCDC141	0.819784	1.19801e-05
CHN1	0.808959	0.0171332
FLOT2	-0.916974	1.50104e-05
LOC120505440	-1.01915	0.0448625
DNAJC15	-1.02538	2.74508e-05
TSNAX	-1.0812	0.00105205
KLF4	-1.18792	5.37604e-05
THBS1	-1.59032	1.2528e-05
Scaffold_Scaffold_7.540499	-1.8675	0.0148867
CCDC39	-1.92569	0.0448625
STC1.1	-2.05046	0.0114506
FER1L6	-2.08782	0.000830213

## Sheet: HEA_LHS
Gene	log2FoldChange	padj
SERPIND1	2.72166	8.72847e-06
MXRA5.1	2.53989	2.54768e-05
MXRA5.2	2.47955	2.54768e-05
COL13A1	2.43119	2.07782e-12
MYBPHL	2.28132	2.54768e-05
LOC121348154	2.23967	7.10444e-05
LRRC17	2.14482	0.00056325
SLC6A9.1	2.10802	0.00168553
IL1R1	2.05144	0.00245195
COL3A1	2.03722	0.000206412
KY	2.02091	0.000396535
LOC109146201	1.97224	0.00398752
LGALS2	1.9294	0.0136284
LOC101751669	1.9288	0.0247452
SEMA4G	1.91964	0.01763
LOC110475131	1.91174	0.0190036
LOC415787	1.86133	0.0223277
Scaffold_Scaffold_17.798339	1.85139	0.00219527
COL13A1.1	1.84536	1.05948e-07
DAP	1.84131	0.0117888
EDNRB2	1.82324	0.0226731
CCDC102B	1.82064	0.0184004
GJB6	1.81292	0.00722111
F3.2	1.80357	0.000201547
CXCL12	1.80202	0.000278215
HAVCR2	1.79201	0.0152031
SPON2	1.7844	0.0239175
GAL3ST1	1.77935	0.0304658
CBSL	1.75807	0.00707365
RORBL	1.75736	0.00234898
VWA8	1.75497	0.0165142
PLXNA4	1.74904	0.0015355
ITGB2	1.7481	0.0131388
AS3MT	1.74313	0.00316208
COL1A1.1	1.72564	0.00426848
ARL4C.1	1.72051	0.0153046
LOC118694229	1.71593	0.016272
SNTB1	1.70396	0.00281105
KCNN3	1.69102	0.0210208
DBN1	1.68524	0.00709223
ABCC6	1.67421	0.0247452
TMSB15B	1.66896	0.008546
PLXNB2	1.66688	0.00709223
SERPINF1	1.6609	0.0179111
PAMR1	1.65909	0.0358048
NPTX1	1.64256	0.0374177
LOC118700958.6	1.62013	0.0319442
SYNDIG1	1.61973	0.0131388
CYGB	1.60873	0.0268548
ENTPD8	1.59404	0.0314336
LOC119696576.2	1.58609	0.0274348
PDPN	1.58156	0.0015355
LTC4SL	1.56541	0.0477407
LTBP1	1.56291	4.06793e-05
LOC119706244	1.56029	0.0374177
RGS16	1.55763	0.0364181
C9ORF58	1.55096	0.0388903
LOC121344354	1.54624	0.0259993
LOC115915981.1	1.53354	0.017548
LOC119700694	1.52523	0.0495223
LOC119707982	1.52325	0.0451765
APMAP	1.52161	0.0423183
COL6A1	1.51	0.00366724
KCNK5.2	1.49746	0.035872
LOC107050724	1.49662	0.0178265
GRM4	1.48224	0.0298869
IL34	1.48089	0.00586799
COL1A2	1.47406	0.000506671
ADAMTS2	1.46718	0.00825316
KCNA3	1.46561	0.0388903
NT5C	1.45162	0.0392614
LOC107050724.1	1.44655	0.0381551
PNPLA3.1	1.44623	0.044637
SPERT	1.40803	0.0333243
MTSS1	1.40771	0.047889
ITM2C	1.40604	0.0410363
B4GALT5	1.40547	0.0447319
ACP5.1	1.39798	0.047889
SLC7A1.1	1.39381	0.0274348
C1QA	1.38644	0.0477609
CA3B	1.38507	0.0440285
LOC113458917	1.38178	0.00810452
LOC119711841	1.37247	0.0419159
APLNR	1.36842	0.0123976
FDPS	1.35988	0.00484085
FBLN1	1.34004	0.00249132
AEBP1.1	1.33569	0.00178394
LOC120510000	1.33271	0.0420955
GTF2H5	1.33245	0.0495932
BMP1.1	1.33203	0.0268548
COL18A1	1.32974	0.00488842
CAMKK2	1.32578	0.0328129
MEGF6	1.3191	0.00993264
LOC115917000	1.30183	0.0466375
LSP1P1	1.29636	0.0115444
PCSK6.1	1.26867	0.0245756
CCDC80	1.26594	0.00230952
FBLN2	1.26173	0.0355194
AGRN.2	1.25418	0.00466755
LOC113459939	1.25187	0.0374177
LOC115913673	1.25041	0.0421974
MYZAP.1	1.24966	0.0419159
LOC418544	1.23358	0.0392614
COL6A2	1.22949	0.0316406
SEPTIN9	1.22186	0.0169632
CUX2	1.22082	0.00225894
MEGF9	1.21494	0.0417114
FKBP10	1.2102	0.01763
AGRN.6	1.20465	0.0318384
LOC103827059	1.19713	0.0121539
ARNTL	1.18686	0.0296375
PCDH18	1.17612	0.00124684
PAG1	1.1663	0.0258256
FTL	1.16604	0.0458626
NID2	1.14385	0.00706263
MARCKS	1.14068	0.0309236
PPP1R3B	1.14038	2.04881e-05
EPHB3	1.12558	0.0336729
LOC103824756	1.12493	0.0214431
NAV2	1.10156	0.000240597
PPM1J.1	1.10154	0.0115444
ST6GALNAC1.2	1.09936	0.0466305
MPP6.1	1.09505	0.0318384
PRELP	1.08446	0.0094912
NEURL1B	1.0696	0.000488164
CD82	1.06721	0.000190026
MXRA8	1.06146	0.00544568
LOC118696420	1.05921	0.00105372
COL5A1	1.05501	7.06777e-06
UCK2	1.05435	0.0109309
ADAMTS10	1.05343	0.0304658
BUB1	1.04287	0.0061232
LIMA1	1.04249	0.0169632
SMYD4	1.04113	0.0268548
RASGRP3	1.03333	0.0481208
CLCN2.1	1.02144	0.0374177
PI16	1.01634	0.0229006
CCND3.1	0.98255	0.0334584
TNFAIP2	0.978478	0.0258909
MYOZ3	0.968837	0.0471472
GM2A	0.964895	0.000122663
GGT5	0.963669	0.0282712
NUP210	0.961304	0.0390359
SRD5A3	0.953532	0.000573167
CAMKK1	0.938634	0.0349737
EXT1.1	0.938366	0.0296375
SLC4A4.1	0.915015	0.000111582
FRZB	0.903982	0.0136284
NID1	0.902067	0.0296375
GLI3	0.897723	0.0411694
LMNB2	0.894454	0.0420955
VAV2	0.891033	0.0082234
LAMA4	0.886784	0.0153046
TLCD1	0.87758	0.0336729
FAS	0.876518	0.0346614
PPP1R9A	0.863311	0.0405092
ITGA11	0.85511	0.0453815
BCHE.1	0.852226	0.0020496
ZFP36L1	0.85049	0.0443034
NRARP	0.841495	0.0466305
SELENOI	0.839567	0.0364236
TNFSF10	0.834043	0.0159278
PREX1	0.833386	0.0252444
PDGFB	0.830335	0.0419159
CDON	0.830184	0.0164401
IGFBP5	0.816008	0.0334752
SEPSECS	0.801122	0.0476505
CASK	0.793361	0.0423183
P3H2	0.792805	0.0442538
ADORA1	0.78685	0.00900875
ETS2	0.783766	0.0109288
MBD3	0.777095	0.0159278
CHSY1	0.776977	0.0410363
CXXC5	0.774878	0.02814
SLC39A14.1	0.765996	0.0486517
MYORG	0.764975	0.0394671
SLC39A14	0.743899	0.0451765
CRIP2	0.74195	0.0021364
KLHL42	0.741676	0.0061232
ACSS2	0.737899	0.0387782
SPARC	0.722533	0.0398231
CDC42EP1	0.708827	0.0431219
PLXNA1	0.696196	0.00431869
SLC12A9	0.673307	0.0374177
SCARF2	0.669014	0.0115134
MESDC1	0.665624	0.00170441
HTRA1	0.655425	0.0024724
SMAD6.1	0.649068	0.00783987
LOC121109116	0.641641	0.0274987
PLXND1	0.627526	0.0477407
ITM2B	0.626787	0.00478791
GJA5	0.624842	0.0484797
MAGI3	0.62184	0.000111582
SLC23A2.1	0.585944	0.000997724
TMEM63B	0.582363	0.0136284
DNAJB6	-0.585099	0.0440285
COPS5	-0.587946	0.00379281
PCMT1L	-0.588148	0.0312816
TBC1D15	-0.590407	0.00531766
SETBP1	-0.593642	0.0336729
SMOX	-0.597368	0.0303714
TOB1	-0.601758	0.00170441
GOLGA4	-0.602922	0.0159278
PPP4R2	-0.61728	0.0214431
SHC3	-0.61814	0.0346614
GRB10	-0.621129	0.00261859
STX18	-0.624406	0.0061232
CDK5RAP2	-0.62478	0.0495223
DCTN1	-0.63388	0.01013
FLT4	-0.638631	0.042328
WDR83OS	-0.638951	0.0495223
SELENOK	-0.642446	0.00763926
FBXL3	-0.644129	0.0277042
PDE8A	-0.648251	9.10567e-09
CREBRF.1	-0.651796	0.0101801
FEM1C.1	-0.657253	5.84886e-06
ATXN7	-0.659617	0.000179332
SAP30L.1	-0.660483	0.0495223
BAG3	-0.661784	0.0336729
MORF4L2	-0.661801	0.000128501
TMEM62.1	-0.667251	0.0374177
VPS13D	-0.673792	0.0492619
HEY1	-0.680212	0.0376586
PIGT	-0.680293	0.00707365
KLF2	-0.680298	0.0430723
LONRF1	-0.687818	0.00281105
CEP97	-0.688991	0.0122356
MAPRE2	-0.695367	0.0196921
NUAK1	-0.695793	0.0131388
ANKS1A	-0.699132	0.0152031
TBC1D25.2	-0.699559	0.0297851
SDHAF4.1	-0.700223	0.008546
KCNT2	-0.700655	0.0296375
FGD6	-0.711708	0.00911352
SLC25A17	-0.714163	0.0466375
DENND5A.1	-0.726417	0.0466305
CTPS2	-0.728454	0.015747
APBA2	-0.730594	0.0155662
PSMD4	-0.732123	0.0466305
IP6K3	-0.734377	0.0112529
ATMIN.1	-0.73498	0.0440285
PER3	-0.735284	0.0237211
PDE4D	-0.738454	0.000396535
TMC7	-0.741892	0.0297813
CREBRF	-0.747172	0.022299
OXSM	-0.751167	0.0150714
KLF4	-0.75679	0.017682
SLC7A6OS.3	-0.761396	0.0418099
PSMA2	-0.762479	0.00792393
PYGB.1	-0.764651	0.0484213
GDPD5.1	-0.772726	0.0413917
CAPZA2	-0.773834	0.0131388
HBP1	-0.786123	0.00321323
RYR2	-0.791098	0.026323
ERBIN	-0.794444	3.00791e-07
PPP1CB	-0.795624	0.00370822
CLIP1	-0.797705	0.00245202
MYOZ2	-0.803295	0.0365128
ALPK2.1	-0.804022	0.0333212
ZFAND5	-0.805677	0.0150391
ABHD2	-0.807859	0.0148035
PCMTD1	-0.818847	0.00320594
FLOT2	-0.827449	3.55293e-05
UBR7.2	-0.830888	0.0495223
MIGA1	-0.832968	0.0073842
UBE2B	-0.832971	0.00714527
DGAT2	-0.834704	0.0296375
TMEM71	-0.838238	0.0274348
ZRANB1	-0.849194	0.00124867
PLIN4	-0.863773	0.028891
PDE2A	-0.885276	0.000592715
SPSB3.1	-0.901437	0.0401356
IP6K2	-0.90648	9.42054e-07
PNPLA8	-0.909629	0.000144506
SLC9A7.2	-0.910095	0.0464594
HIST1H2B7	-0.912375	0.0296375
DBNDD2	-0.912941	0.0159278
LMOD2	-0.913374	0.0152011
SHROOM3	-0.926371	0.00709223
ENTPD6	-0.935449	0.0496556
RNF144A	-0.939061	0.00245195
PLCXD2.1	-0.956304	0.0159278
MYOT	-0.967459	0.000128501
LDB3	-0.972626	0.000506671
RGS7BP	-0.97775	0.0168542
ACACB	-0.977839	0.0319442
TEK	-0.989474	0.0453413
LOC422353	-0.992614	0.00124867
PNPLA2.1	-0.992884	0.000462596
PGM1	-1.00069	0.0249616
MKNK2	-1.00237	0.00919135
NUDT17.1	-1.00792	0.0281601
STX7.2	-1.01644	0.0117479
PNPLA2	-1.02423	3.34433e-06
HSPB9	-1.02507	0.000259856
METTL21EP	-1.02711	0.02814
SORBS3	-1.03707	0.00146609
FHIP2A	-1.04338	0.00366724
METTL5	-1.04379	0.00582503
PGM5	-1.04854	0.00236791
GPCPD1	-1.05611	0.000572645
ZYG11A	-1.0638	4.60421e-05
KLHL38	-1.07032	0.0250829
DNAJC15	-1.072	1.62514e-06
CSRP3.1	-1.08099	5.9857e-05
GABARAPL1	-1.08153	0.0111258
THBS1	-1.09316	0.00381754
NTN4L	-1.13099	0.00056325
ANKRD1	-1.13679	0.0417114
ANKRD9	-1.14538	4.95221e-05
AGL	-1.16437	0.000256039
TWF2	-1.18012	3.89461e-05
TSNAX	-1.18672	2.54768e-05
SLC7A6	-1.18698	0.000722195
AOX1.3	-1.18841	0.0440262
TXNIP	-1.20074	0.00162072
LOC120506716	-1.20451	4.6745e-05
JMJD1C.1	-1.21769	0.00168553
MB	-1.24925	0.0159278
ESM1	-1.2526	0.006289
ABCA9	-1.25832	3.86391e-06
PCASP1	-1.26021	4.68787e-07
CHAC1	-1.28178	0.0481208
FOXO3	-1.29128	1.15227e-12
LOC116807842.1	-1.32094	0.0359084
ATOH8	-1.32291	0.00170441
DOCK5	-1.32372	0.0430723
ZBTB32	-1.32999	0.0274348
ZBTB16	-1.34598	0.0207869
CCDC122.1	-1.35077	0.0333236
JAKMIP1	-1.35108	0.0419159
GMNN	-1.35668	6.96386e-07
MAP1LC3A	-1.37808	1.05948e-07
RND3	-1.38223	0.00245195
COA7	-1.40006	0.000697184
LOC121658691	-1.40088	0.00707365
TIMP4.1	-1.40855	0.0440285
LOC111937686	-1.42165	0.0274987
TEF	-1.43158	0.00170441
CAB39L	-1.43298	1.84494e-05
PLB1	-1.43313	0.0374177
LOC115491092	-1.43495	0.0274987
NR1D2	-1.43507	0.000488164
LETM1.2	-1.43822	0.0333236
SLC2A11	-1.43919	0.0419159
LOC120509988	-1.4449	0.0421974
LOC121340341	-1.46664	0.00370822
LOC118686255	-1.48598	0.0388085
FER1L6	-1.49215	0.0226731
LOC113459072	-1.49283	0.0477407
LOC104683239	-1.50619	0.0376586
LOC113459729	-1.52368	1.41141e-12
Scaffold_Scaffold_2.136834	-1.52416	0.0336729
LOC120510067	-1.53682	0.00178394
LOC120502567.1	-1.5374	0.0388085
LOC121667779	-1.55931	0.0117479
SGTB	-1.56126	2.22757e-05
CLDN11	-1.57137	0.0256423
LOC121471106	-1.57808	0.0256404
LHFPL5	-1.58137	0.00177395
LOC120509206	-1.60237	0.00733151
MMP17.1	-1.61761	0.000246755
FBXO39	-1.62143	0.0484213
LOC113458836	-1.62281	0.0316406
SLC2A11.1	-1.62832	0.0178265
ASXL3.1	-1.62941	0.0164715
PPHLN1	-1.63781	0.0150714
SPATA18	-1.64428	0.0466375
MYLK4	-1.64704	0.0136284
NKX6-3	-1.65022	0.0271809
Scaffold_Scaffold_2.198289	-1.65607	0.0331457
DOCK5.1	-1.6605	1.6973e-05
TDH	-1.66442	0.000387716
PDK4.3	-1.71387	0.0055171
SLC30A1.1	-1.7245	0.00128667
LOC120507804	-1.74344	0.0136284
LOC108445292	-1.77369	0.000201547
OTUD1	-1.8284	0.000201547
YBX3.6	-1.84081	0.0298869
LOC119709997	-1.85459	0.0152031
LOC120513175	-1.93271	0.0109288
DDIT4	-1.95299	1.6973e-05
PDLIM3	-2.07422	9.31246e-10
Scaffold_Scaffold_7.548249	-2.13212	0.00178394
FXYD2	-2.14644	1.8266e-06
PDK4.2	-2.32282	2.21732e-05
LOC118699990.2	-2.41647	0.000164357
FKBP5	-2.47205	1.71141e-27

## Sheet: HEA_storm
Gene	log2FoldChange	padj
LOC119710186	2.5096	2.80421e-07
LAMB3.3	2.50909	0.000354133
FKBP5	2.42428	1.93838e-26
LOC111933572.1	1.98897	0.0119006
GLP2R.1	1.7946	0.00754702
LOC119698044.1	1.75615	0.0148074
GAD2	1.72967	0.0280991
CDH8	1.72142	9.72421e-05
LAMB3.2	1.68473	0.0170925
LOC121361545	1.61323	0.039851
RD3L	1.60426	0.00375348
Scaffold_Scaffold_11.667558	1.48966	0.0359833
RGS6	1.47524	0.00289355
RUNX1.1	1.43227	0.0247725
NECAB2	1.40588	0.0337799
MYPN.24	1.40217	0.0228946
DDIT4	1.39686	0.00731272
HABP2.1	1.39061	0.0155127
FGFR1.1	1.38209	0.00167195
LOC121667779	1.3627	0.0348957
PDE4C.2	1.33867	0.0121798
MB	1.32639	0.00952725
ZBTB32	1.29488	0.0321974
FOXO6.1	1.28369	0.0348957
RANGAP1	1.26314	0.000610673
ZDHHC2	1.25503	0.0321974
MED30.2	1.24066	0.02584
ZBTB16	1.23754	0.03766
RELT	1.20215	0.0269212
LOC116996222.1	1.18188	0.0372666
PM20D2	1.18118	0.0267987
GMNN	1.16777	7.44521e-05
MTHFD2	1.1565	0.0348957
NSMF	1.09434	0.000454707
MMP17.1	1.08787	0.0365156
ZNF423	1.08482	0.0231096
FAM168A	1.08332	2.61343e-05
SGTB	1.07781	0.0125106
DUSP8	1.06593	0.0320759
HK2	1.06071	0.00749737
PPP4C	1.04688	0.0209432
MKNK2	1.02956	0.00782138
PLAGL1.1	1.0238	0.00749737
LRRC1	1.02018	0.0217676
ATMIN.1	1.00947	0.0022837
ST8SIA6	0.99346	0.00822638
TMEM71	0.991314	0.00586072
NFE2L3	0.97587	0.0348957
FOXO3	0.974713	1.00411e-06
CCDC141	0.972107	1.40402e-09
CCDC94	0.967972	0.0424664
KLF9	0.967399	0.00863728
LOC422353	0.957882	0.00301661
ABCG1	0.941756	0.0247725
ZRANB1	0.939719	0.000354133
RHOG2	0.935604	0.00971011
CACNA2D1	0.918301	0.0408957
CNOT7	0.911671	0.000610673
NUDT4	0.910134	0.00562012
CDC37L1	0.898789	0.0358872
HSPB9	0.8923	0.00375348
RCAN2.1	0.891213	0.00352723
ANKS1A	0.890132	0.000884632
ZBTB44.1	0.887427	0.0139309
NTN4L	0.882373	0.0177078
KIAA0907.1	0.876638	0.0372666
DNAJC15	0.872625	0.0004531
HACD1	0.858761	0.0246319
IP6K2	0.857147	8.1005e-06
FAM181A	0.850446	0.003355
CDADC1	0.84372	0.00599977
DBNDD2	0.843174	0.0320759
RCAN2	0.843134	0.0170394
CSRP3.1	0.843086	0.00602315
PTN	0.842552	0.00375348
PPARGC1B.1	0.83074	0.0172478
HSF3	0.826155	0.00217449
NAA30.1	0.817575	1.40402e-09
DRG1	0.813028	0.00642175
LRP12	0.81053	8.47012e-05
MFN2	0.810502	0.0291581
TESK1	0.809326	0.0219651
CPEB4	0.808241	0.00110517
PHTF2	0.804965	0.0358872
CMTM7	0.79959	7.44521e-05
MYOT	0.799158	0.00456933
SLC25A15	0.797989	0.00690953
PDP1	0.797066	0.0068787
CDK5RAP2	0.774543	0.00822638
MLF1	0.764551	0.0424664
GINS3	0.762294	0.0247725
EFCAB14	0.762211	0.00170078
BCL2L13.1	0.74565	0.00289355
LANCL2	0.740599	0.00748388
CREBRF	0.733825	0.0250346
SREK1	0.733646	0.0228946
PSMA2	0.733339	0.0102069
RPRD1A.2	0.729338	0.000531887
OSER1	0.726418	0.0345767
TBC1D25.2	0.724806	0.0219612
JPH1	0.72075	0.00171087
ZC3H7B	0.717905	0.00602315
NHLRC2.1	0.717194	0.0221277
MITF	0.707627	0.0168505
BIRC3	0.707373	0.0372666
SLK	0.704292	0.00520547
ASB2	0.702763	0.0447093
MFHAS1	0.691013	0.0270601
CREBL2	0.677259	0.0403576
FERMT2	0.674162	0.0321974
PTAR1	0.670966	0.0390807
MORF4L2	0.668373	0.000180995
CDC42EP3	0.665568	0.0386483
PIK3R4	0.659162	0.00192142
SAMD8	0.65806	0.0241166
PPIG	0.654194	0.0113059
SHC3	0.652408	0.0225075
PDE2A	0.646061	0.031213
STAM	0.645057	0.0320759
RAB41	0.638886	0.0320759
PSME4.1	0.63796	0.0216946
SGK1	0.635584	0.00079603
ZYG11A	0.632276	0.0494869
TANC1	0.631405	0.0089493
PPARA.2	0.631279	0.0474103
AMPD1	0.62546	0.0424664
METTL18	0.622489	0.0492559
FGFR1OP	0.616067	0.0321974
PDE4D	0.614507	0.00754549
CREBRF.1	0.613528	0.0201458
CYLD	0.610155	0.0193978
NAA16	0.60686	0.00127543
PPP1CB	0.605125	0.0486041
SLC6A6	0.602796	0.0377913
PPP4R3A.1	0.601111	0.0219612
UBE2D2.1	0.595661	0.00055204
YAF2	0.590396	0.0478046
AMD1	0.586133	0.0335166
PNPLA8	0.584938	0.0419911
LCORL	0.583607	0.0247725
ADSS2	-0.585815	0.0144595
PODXL	-0.589543	0.00769593
PDZD11	-0.592537	0.0478046
LOC121106455	-0.595686	0.019396
RPL3	-0.613512	0.0233355
SCARF2	-0.633711	0.0206833
DAD1	-0.657133	0.0127248
LSMEM1	-0.663516	0.0464112
LOC120410466	-0.664881	0.00674495
METTL10	-0.667538	0.0424664
CAPN11	-0.678405	0.00562012
LOC415664	-0.6914	0.0463341
FUK	-0.691531	0.0235069
AKR7A2	-0.692991	0.0348957
HEXA	-0.694464	0.0068787
IAH1	-0.694923	0.0451704
ACAA2	-0.706054	0.0138542
COL5A1	-0.711126	0.00817977
ACSL1	-0.712613	8.1005e-06
PTPRG	-0.725907	0.00375348
SPARC	-0.732928	0.0353253
TRAPPC4	-0.735644	0.0246319
METTL26	-0.749606	0.0359833
ECE2	-0.75435	0.0219612
LOC121676682	-0.758708	0.0477589
APBB3	-0.764755	0.00375348
SLC5A6	-0.766001	0.0478046
HM13	-0.766494	0.0228946
KLHL42	-0.770735	0.00434713
METAP1D	-0.79052	0.0403576
LOC118696420	-0.794791	0.0308729
ABCG2.1	-0.804914	0.0360578
CDON	-0.805374	0.0219612
SLC25A10	-0.806037	0.00200212
GRN	-0.814229	0.0218103
ATOX1	-0.81451	0.0424664
CD82	-0.81474	0.0118909
TNFSF10	-0.819473	0.0209397
FRMD6	-0.821604	0.0022837
TMED8	-0.822654	0.0451704
PER3	-0.822692	0.0083389
CHCHD10	-0.826571	0.0388561
HSPA5	-0.828844	0.0474103
SESN4	-0.829698	0.0286427
SRD5A3	-0.843249	0.00463864
NXPH2	-0.845151	0.0488951
TRMT9B	-0.860316	0.0228946
PIEZO2	-0.862489	0.0466316
HERC3.1	-0.871705	0.00731272
RDH10	-0.883755	0.0377913
CHRD.1	-0.883915	0.0321974
LOC776816.1	-0.885371	0.0480445
NICN1	-0.907811	0.0218103
Scaffold_Scaffold_3.285566	-0.91707	0.0484585
SH3D19	-0.926263	0.0106715
SCAMP5	-0.94909	0.0320759
RAD51D	-0.982619	0.0424664
COMT	-0.985705	0.0474103
SNX7	-0.99385	0.000960609
ODC	-1.00161	1.00411e-06
C12orf10	-1.00181	0.00499801
PDIA6	-1.02206	0.039483
NID1	-1.02649	0.00931565
CPT1A	-1.03876	0.0241166
TXNDC15	-1.04805	0.0491927
NPM3	-1.05979	0.0463341
LAMA4	-1.06288	0.0022837
MPG	-1.06301	0.02249
PIGC	-1.06418	0.0341678
COL15A1	-1.0724	0.0433056
TIMM10	-1.08283	0.0229232
ACAD11	-1.09207	0.0349507
PHEX	-1.11814	0.0452285
ST6GALNAC1.2	-1.12526	0.0365382
LOC110357668	-1.13646	0.0280991
NID2	-1.1433	0.00754702
TMEM41A	-1.14783	0.0089493
BEND7	-1.151	0.0307976
ERP29	-1.17117	0.0470051
TGFBI	-1.18428	0.0022837
LOC102074667	-1.18786	0.0120977
EHHADH	-1.20001	0.0494272
DHFR	-1.2137	0.0345922
TMEM241.2	-1.23388	0.0321974
HNF4beta	-1.24953	0.0249828
HEMK1	-1.25711	0.0155127
GAS2L1	-1.27307	0.0403576
CCDC80	-1.27873	0.00289355
CRTAC1	-1.28704	0.0424664
C18H17orf67	-1.2873	0.0121009
LOC107204939	-1.28753	0.0321974
SDC1	-1.29024	0.00632784
SPR	-1.2962	0.0450352
LUM	-1.29996	0.000384575
FDPS	-1.31769	0.00817977
DAPK2	-1.31929	0.00527723
NIPSNAP3A	-1.32279	0.0250346
TMEM17.1	-1.32364	0.0068787
HNMT	-1.32676	0.0381308
FAM19A3	-1.33254	0.0451704
LTBP1	-1.34017	0.00114145
PCSK6	-1.35244	0.0280991
BDH1B	-1.3546	0.0335166
COL3A1	-1.36464	0.0407814
LOC121353644	-1.3757	0.0360578
APLNR	-1.37769	0.0120891
ATL1	-1.38593	0.0216946
CIDEA	-1.39087	0.0150714
OCLN	-1.39189	0.0360578
DBN1	-1.42129	0.0341678
C8orf22	-1.42246	0.0372666
LRRC58	-1.42913	0.038504
GSTZ1	-1.43135	0.0320759
RIMBP2	-1.43426	0.0295725
WFDC1	-1.44794	0.00817977
PLXNB2	-1.4497	0.0295725
AMACR	-1.46001	0.0191161
LOC429098	-1.46186	0.0372666
PGM3	-1.46287	0.0155127
CPAMD8	-1.46821	0.0250346
PI16	-1.47396	0.000180995
LOXL4	-1.47525	0.0141739
TRIM28.1	-1.49109	0.00602315
CTBS	-1.49934	0.02584
CSMD2.4	-1.50407	0.0450083
ABCD4.1	-1.50744	0.0209397
COL1A2	-1.51013	0.00055204
TSPAN13	-1.51635	0.0231096
LOC115615592	-1.51808	0.028021
ANO6	-1.51876	0.0383969
PCSK6.1	-1.53075	0.00375348
SRR	-1.53093	0.00860508
BICD2	-1.53333	0.00749737
B3GALT2	-1.54124	1.00411e-06
SULT1B1	-1.5481	0.0223081
ABCC6	-1.55276	0.0424664
COL1A1.1	-1.55345	0.0165284
GAMT	-1.57128	0.0193723
COQ2.1	-1.57924	0.00356602
CHAC1	-1.57954	0.00475024
FMN2.1	-1.6062	0.013321
HYI	-1.60787	0.0170502
KLHL1	-1.6095	0.0321974
LOC107202407	-1.63257	0.00952725
AIFM3	-1.64275	0.0359833
SPTBN5	-1.64323	0.00363626
MAP7	-1.65033	0.0349507
RAPGEF4	-1.65436	0.00381337
LOC115484317	-1.65537	0.0341678
AS3MT	-1.66138	0.00731272
SHMT2.1	-1.66396	0.0116602
BTD	-1.67347	0.00375348
MYO5B	-1.67702	0.0466316
LOC109146201	-1.71094	0.0222435
BAMBI	-1.72649	0.0218103
DLG2.1	-1.73872	0.0209397
LOC121345429	-1.74835	0.0118909
LOC415787	-1.75839	0.0400385
PER2	-1.77558	1.69946e-05
ADGRG4	-1.78359	0.0217676
ANKRD34B	-1.79086	0.0106715
SPON2	-1.79567	0.0218103
LOC107215865	-1.80989	0.000286119
MTHFS	-1.81646	0.00573153
SEMA4G	-1.82768	0.0345922
LTC4SL	-1.86933	0.00959557
IL1R1	-1.8699	0.0107905
LOC110475131	-1.90798	0.0215535
FGGY.5	-1.92766	0.000960609
NGEF.1	-1.94229	0.010241
GAL3ST1	-2.02856	0.0068787
APMAP	-2.07492	0.00156351
LOC101751669	-2.11468	0.00103524
TRIM28	-2.17429	7.41538e-05
SERPIND1	-2.21295	0.00226976

## Sheet: HYP_spring
Gene	log2FoldChange	padj
LOC118691923	-0.709717	0.042058
Scaffold_Scaffold_7.540499	-0.744658	0.000768307
SCN3B.2	-0.794493	0.00835011
MGP	-0.82903	6.98389e-06
LOC106862186	-0.833019	0.00835011

## Sheet: HYP_LHS
Gene	log2FoldChange	padj
NPAS2.3	0.791698	5.04953e-06
LOC118686116	0.669712	0.022278
LOC121364112	0.64884	0.0183204
LOC415787	0.636152	0.0494412
CARD10	-0.602414	0.0494412
NEK6	-0.605672	0.0223192
MFAP5	-0.619242	0.00556103
ATP8B1	-0.639795	0.0165423
RHPN2	-0.650153	0.00897349
ETV4	-0.653691	0.0306183
NPY7R	-0.655726	0.0223192
FBXO32	-0.666448	0.000366877
CYP1B1	-0.673716	0.0194921
KLHL38	-0.686435	0.0119019
MGP	-0.688401	0.000366877
SLC25A48	-0.688791	0.0223192
JMJD1C.1	-0.692255	0.0120713
DUSP1	-0.693607	3.15525e-06
PDK4.2	-0.695936	0.00845928
SCN3B.2	-0.753223	0.00698465
LOC116446880	-0.796723	0.00245579
LOC107201741	-0.796973	0.000169345
PER3	-0.897554	0.000121365
SAMHD1.18	-0.993402	1.0506e-05
GPD1	-1.02628	9.01913e-11
FKBP5	-1.59375	7.01815e-24

## Sheet: HYP_storm
Gene	log2FoldChange	padj
FKBP5	1.3713	1.05742e-17
PCK1	0.952005	0.000118223
MAT1A	0.947748	6.65758e-05
ALDOB	0.867502	0.000926863
AvBD9	0.792959	0.00598799
CPS1	0.755814	0.00640415
FGB	0.73186	0.0110839
KLHL38	0.724799	0.00318982
GPD1	0.708596	0.000151335
LOC102069689	0.698889	0.0155446
RBP4A	0.697253	0.0244906
MMP11	0.69262	0.00127419
LOC417131	0.674702	0.0110839
NR1D1	0.669431	0.0175352
SOUL	0.663007	0.0293007
NPC1.1	0.66163	0.0283085
ZBTB32	0.660732	0.0155446
PIGR	0.656701	0.0222093
LOC107201741	0.650974	0.00353707
TBC1D2	0.647765	0.00642893
AHSG	0.645767	0.0346876
LOC118695741	0.643757	0.0407778
C8orf4.1	0.629866	0.0312835
XDH	0.612316	0.0175352
FBXO32	0.609842	0.00231133
ETV4	0.609095	0.0403065
MFSD2A	0.599915	0.00318982
RGS2	0.583247	0.00642893
LOC118684129	0.580585	0.0418639
PDRG1	-0.580221	0.0175352
TAC3	-0.582	0.0357077
FLT3LG	-0.584522	0.00700749
LOC118694933	-0.591117	0.0255575
PIP4P1.1	-0.593456	0.0070491
ZNF385A.2	-0.594012	0.040175
NCAN.3	-0.60627	0.0491561
LOC115916408	-0.613406	0.0487857
UCN3	-0.620574	0.0407778
RTKN	-0.630606	0.00227626
PER3	-0.645466	0.00803268
CRY1	-0.653357	0.00231133
LOC119711619.1	-0.657322	0.0155446
CCKBR	-0.663819	0.0155446
WDR45	-0.716119	0.00298035
LOC120511459	-0.71835	0.0110839
PIH1D1	-0.784302	0.00318982
CCKBR.1	-0.819358	0.000926863
LOC118696013	-0.971638	1.8786e-05
PER2	-1.44668	1.07659e-19

## Sheet: LIV_spring
Gene	log2FoldChange	padj
TBC1D8.1	2.89223	9.18258e-05
FABP7	2.83943	6.06508e-09
ME1	2.83516	6.1993e-31
ARFGAP3.1	2.79675	3.03381e-07
LDHA	2.6968	6.06508e-09
LOC115909152	2.34541	0.00346062
LOC421965	2.28137	0.0047175
SNX33.1	2.25924	8.90865e-05
C8orf22	2.24764	0.000362732
LOC428851	2.23663	0.0125744
PRSS35.1	2.21115	0.000536803
RXRG	2.11494	0.00085361
LOC116184450	2.10099	0.04941
LOC120510167	2.08501	0.0116277
SCD	2.08141	5.64876e-05
LOC118696679	2.03844	0.0339468
CLPS	2.02033	0.0156112
LOC115350628	2.00655	0.00399991
PGA5	1.99912	0.00415803
LOC108449509	1.9982	0.00205165
URB1.10	1.97872	0.021119
CFAP44	1.97689	0.0320197
LOC102060448	1.96853	0.010389
PRSS35	1.91578	0.0365148
SSPN.1	1.80791	0.0370989
RD3	1.80035	0.0399471
ELOVL6	1.79206	1.9594e-10
ACSBG2.1	1.78617	0.0220212
BBOF1	1.77594	0.0425257
RAB34	1.76615	0.00698433
ARNTL	1.74994	0.00232759
ATF3	1.74111	0.0193949
TLCD1	1.73903	3.18277e-07
CS	1.73343	0.000149413
LPIN1	1.70479	0.026853
NEK11.4	1.69702	0.00689967
LOC119706833	1.65166	0.0108281
SLC39A10.1	1.65164	1.58291e-06
TDRD1	1.63411	0.0320197
TERF2IP	1.62195	0.0150066
TSR1	1.60568	0.000539719
MIS18A.9	1.59718	0.0492331
MIS18A.4	1.57781	0.0463675
CREB3L3	1.57124	1.40099e-06
REEP6.3	1.53734	0.0409544
LOC107051857	1.51524	0.00399991
LOC120504737	1.49312	0.0017365
GBE1.1	1.48979	7.95536e-08
GLB1L	1.46529	0.00371787
LOC118699958	1.441	0.0425257
OSGIN1	1.43707	0.0399471
RGN	1.42137	0.0104508
GBE1	1.41617	0.000147379
LOC115917646	1.41182	0.0424271
SLC44A1.2	1.41017	0.0449054
C1orf131	1.39694	0.000140624
NOXA1	1.38192	0.0156112
PPP1R1C	1.35489	0.0368813
PDCD2	1.35316	1.65536e-05
TKFC	1.32287	3.99365e-09
RORBL	1.29937	0.0193661
VWCE	1.29083	0.00402495
PPP1R3G	1.23128	0.0200702
PARD3	1.202	5.14699e-14
TMEM135	1.19569	6.46014e-05
MTR	1.16663	0.0384779
MDH1	1.1617	1.15203e-05
PAPSS2	1.15792	2.06704e-05
STARD13	1.12272	0.00727733
DUSP1	1.11174	0.00232759
AGPAT3	1.10229	3.9102e-08
HSD11B1B	1.08172	0.0421273
FASN	1.07667	1.72548e-06
PLCXD1	1.07216	0.0411333
LPCAT3	1.07179	0.0108281
PC	1.04092	0.00150872
DLAT	1.00188	0.00727733
NDRG1	0.984335	0.0221332
SPG21	0.963147	0.00371787
PC.2	0.949265	0.0320197
SECISBP2L	0.943041	0.0320197
GNPAT	0.940433	4.58846e-07
SIX4	0.920308	0.0156112
PDHA2	0.905368	0.0214464
PARD3.2	0.903274	0.0370989
AFMID	0.899421	0.029027
ELOVL5	0.878337	0.00650992
AGPAT3.1	0.848635	0.00526028
ABCA1	0.824747	0.0377668
WWP1	0.798842	0.000441309
ATG13	0.73819	0.0407805
C2CD2.1	0.694394	0.0381799
ITM2B	0.641416	0.0407805
TTC39C	0.62363	0.0416588
Scaffold_Scaffold_4.347247	0.612574	0.0320197
ARMC7	-0.643903	0.0169378
CMPK1	-0.656607	0.0339242
REEP6.1	-0.706824	0.00727733
PIP4K2C	-0.721325	0.00253243
LOC101749377	-0.752426	0.0303286
HSF2	-0.811296	0.0368529
MCM8	-0.817097	0.04941
TCAIM	-0.840139	0.0381945
AGMAT	-0.842556	0.0320197
NXPE3	-0.850486	0.0370989
KCNT2	-0.865923	0.0154398
ALDH9A1	-0.872825	0.0179992
FGB	-0.889255	0.0171132
NR1H4	-0.909701	0.00205165
LOC102069689	-0.931121	0.0381799
LOC421506	-0.939728	0.0136741
SLC20A1	-0.940241	0.0463599
SLC22A5	-0.956103	0.0370989
CTCFL	-0.960087	0.00689967
ABHD2	-0.981062	0.0370989
FGG	-1.01026	0.00443568
FGA	-1.01655	0.00232598
PIGR	-1.03237	9.18258e-05
CNTRL	-1.04108	0.0213837
C8A	-1.04861	0.0224058
NT5C	-1.05875	0.00150439
TRAIL-LIKE	-1.12865	0.0303286
TMEM5	-1.12961	0.0214273
NUDT13	-1.1421	0.0331725
SLC23A2	-1.15107	0.00443568
SRC	-1.17515	0.0221851
MGST3	-1.24112	0.00920606
F13B.2	-1.2747	0.0365148
RNF19B.1	-1.31074	2.90043e-06
SLC6A9	-1.33014	0.0110409
PAPSS2.1	-1.33934	0.00443568
SLCO2B1.1	-1.38639	0.00240503
SLC6A9.1	-1.42222	0.00371787
CP	-1.44845	0.00393019
WFDC8	-1.49254	0.0278503
ANKRD6.1	-1.56331	0.0320197
LOC121335630	-1.63312	0.0421273
MT4	-1.63736	0.00273792
LOC119698330	-1.70441	0.0293501
LOC120499733	-1.73024	0.0320112
SAMSN1	-1.73784	0.0381799
GREB1L	-1.74451	0.000904002
EGF	-1.77748	0.0409544
LOC102045068	-1.83056	0.00371787
SLC22A3	-1.8435	0.00650992
LOC115496780.2	-1.87628	0.00770188
Scaffold_Scaffold_9.605047	-1.87837	0.029027
HSPB9	-1.88315	0.0416588
ZNF385B	-1.89724	0.00727733
MT3	-1.90852	0.00388662
PHACTR3	-1.94607	0.04941
LOC117244698	-1.98637	0.0189718
DGKB	-1.99247	0.0176842
LOC115948407.2	-2.02392	0.00906907
HSPBAP1	-2.06472	0.0173856
LOC121469361	-2.09697	0.0209976
ADAM11	-2.1291	0.000541669
HEXDCL	-2.19777	0.0370989
CCNA1	-2.27412	0.000367436
Scaffold_Scaffold_1.62329	-2.44607	0.00413419
LOC119700825	-2.64541	3.74971e-06
ANKRD42	-2.69782	6.73584e-15

[truncated: 5 more sheets: LIV_LHS, LIV_storm, PIT_storm, ADR_storm, FAT_storm]
